# Supplementary material for: Disruption of the pancreatic vasculature in zebrafish affects islet architecture and function
Source: Oxford University Press journal article supplement (doi:10.1242/dev.173674), 2019-01-01
Supplement: dev173674supp.pdf [file dev173674supp.pdf]

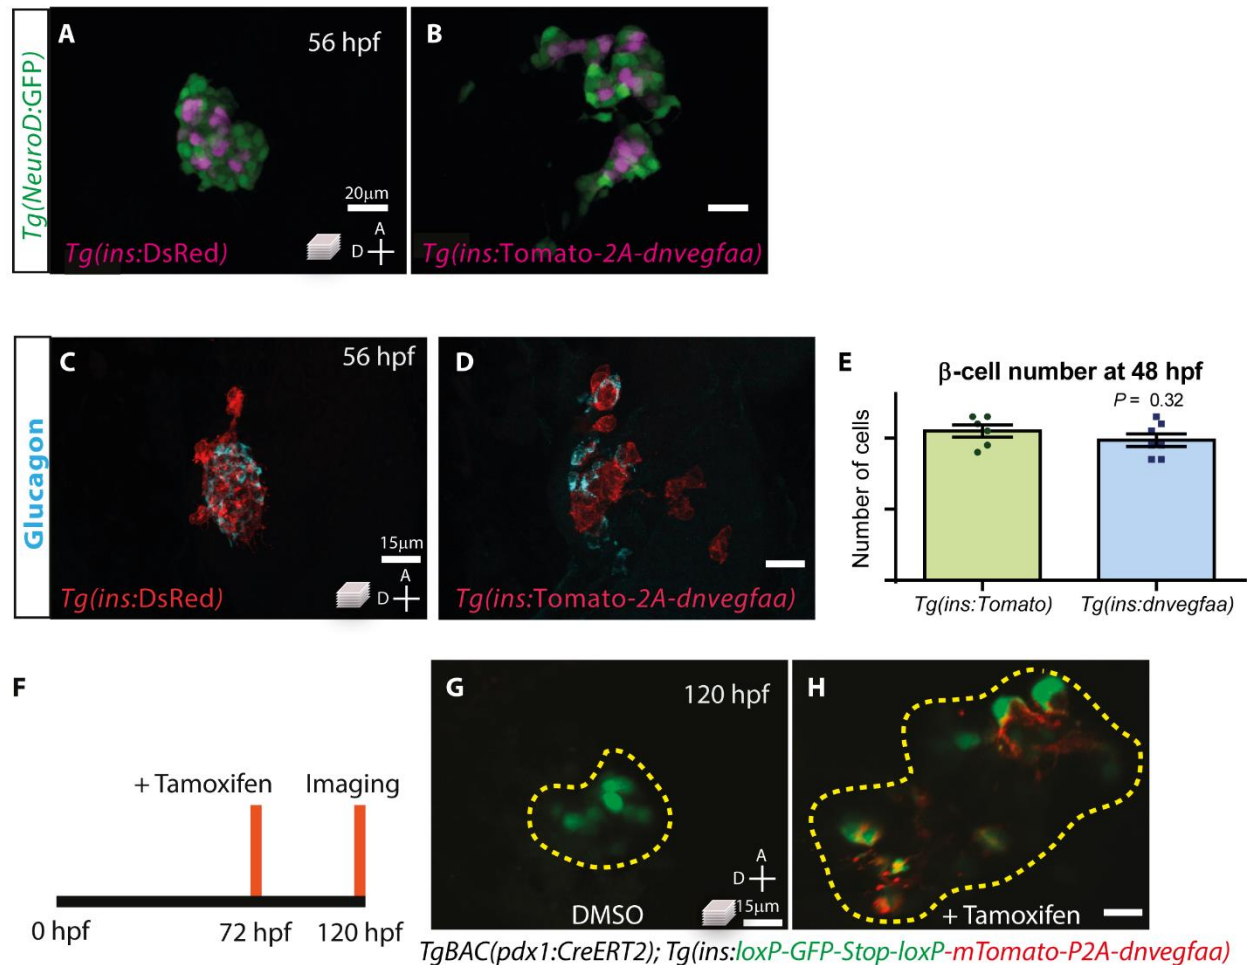

**Figure S1:  $\beta$ -cell specific expression of dnVegfaa at embryonic or post-embryonic stages results in islet disruption.** A-B) Pancreatic endocrine cells (green) in 56 hpf *Tg(NeuroD:GFP)*; *Tg(ins:DsRed)* and *Tg(NeuroD:GFP)*; *Tg(ins:dnvegfaa)* embryos. C-D) Confocal projection images of the pancreatic islet in 56 hpf *Tg(ins:DsRed)* and *Tg(ins:dnvegfaa)* animals showing Glucagon-positive  $\alpha$ -cells (cyan). E) Number of  $\beta$ -cells in 48 hpf *Tg(ins:dnvegfaa)* and *Tg(ins:DsRed)* animals; mean  $\pm$  SEM,  $n = 6-7$  animals.  $P$  values from t-tests are presented. F) Induction of *dnVegfaa* expression in *TgBAC(pdx1:CreERT2)*; *Tg(ins:loxP-GFP-STOP-loxP-mTom-P2A-dnVegfaa)* animals with 10  $\mu$ M Tamoxifen treatment starting at 72 hpf and imaging at 120 hpf. G-H)  $\beta$ -cells in 120 hpf *TgBAC(pdx1:CreERT2)*; *Tg(ins:loxP-GFP-STOP-loxP-mTom-P2A-dnvegfaa)* larvae treated with DMSO (vehicle) or Tamoxifen. Yellow dotted lines outline the spread of the  $\beta$ -cells in the primary islet. Maximum intensity projections are presented; A, anterior; D, dorsal.

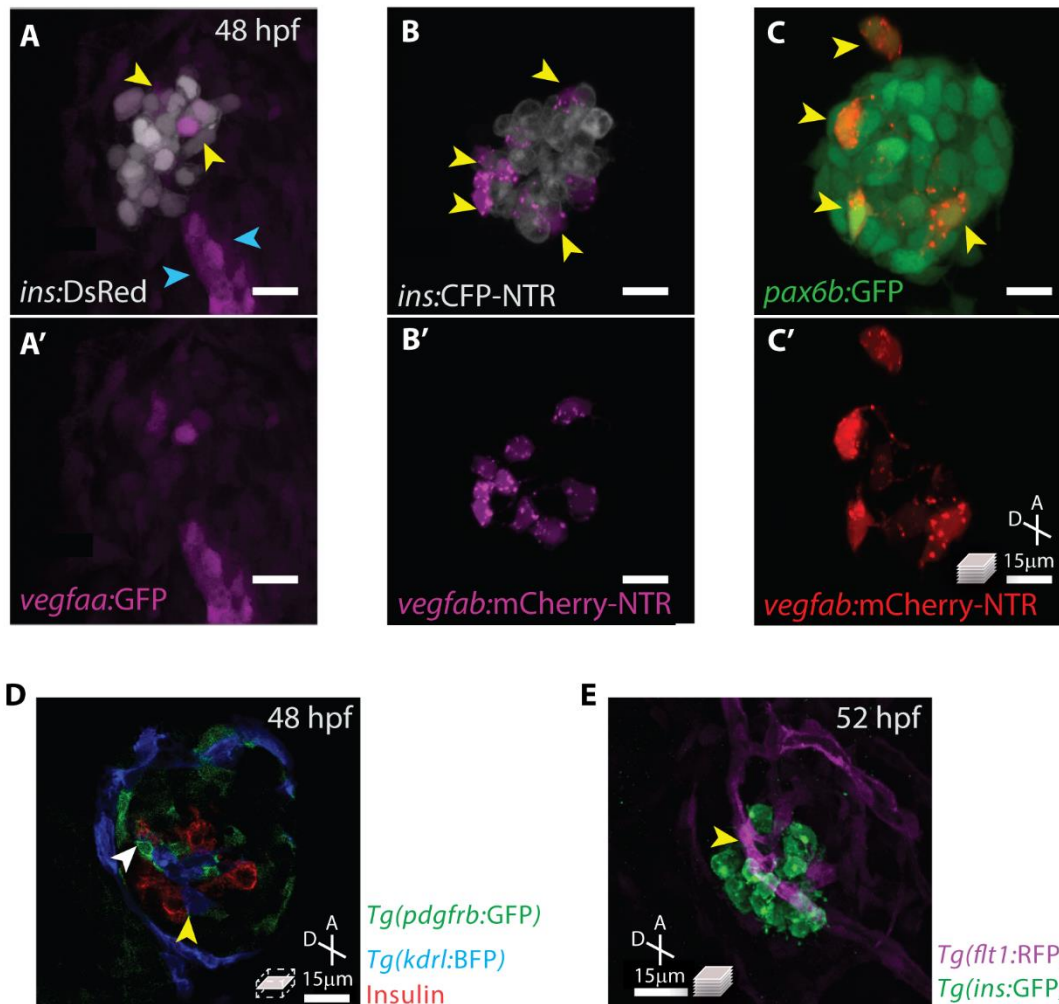

**Figure S2: *vegfaa* and *vegfab* are expressed in and around the pancreatic endocrine cells.** A) β-cells (white) in 48 hpf *TgBAC(vegfaa:GFP); Tg(ins:DsRed)* embryos. Yellow arrowheads point to *vegfaa* expressing β-cells. Blue arrowheads point to *vegfaa* expressing cells close to the islet that likely belong to non-endocrine lineages. B) β-cells (white) in 48 hpf *TgBAC(vegfab:gal4ff); Tg(UAS-E1b:Nfsb-mCherry); Tg(ins:CFP-NTR)* embryos. *TgBAC(vegfab:gal4ff); Tg(UAS-E1b:Nfsb-mCherry)* is referred to as *Tg(vegfab:mCherry-NTR)*. Yellow arrowheads point to *vegfab* expressing cells around β-cells. C) Pancreatic endocrine cells (green) in 48 hpf *Tg(vegfab:mCherryNTR); Tg(pax6b:GFP)* embryos. Yellow arrowheads point to *vegfab* expressing endocrine cells. Maximum intensity projections are presented. D) Confocal plane of the primary pancreatic islet in a 48 hpf *Tg(kdrl:BFP); Tg(pdgfrb:GFP)* embryo showing β-cells (red). Yellow arrowhead points to a *kdrl* expressing endothelial cell in contact with a β-cell. White arrowhead points to a *pdgfrb* expressing cell in contact with a β-cell. E) Confocal projection image of the primary pancreatic islet in a 52 hpf *Tg(ins:GFP); Tg(fts1:RFP)* embryo showing β-cells (green). Yellow arrowhead points to a *fts1* expressing blood vessel in the islet. ; A, anterior; D, dorsal.

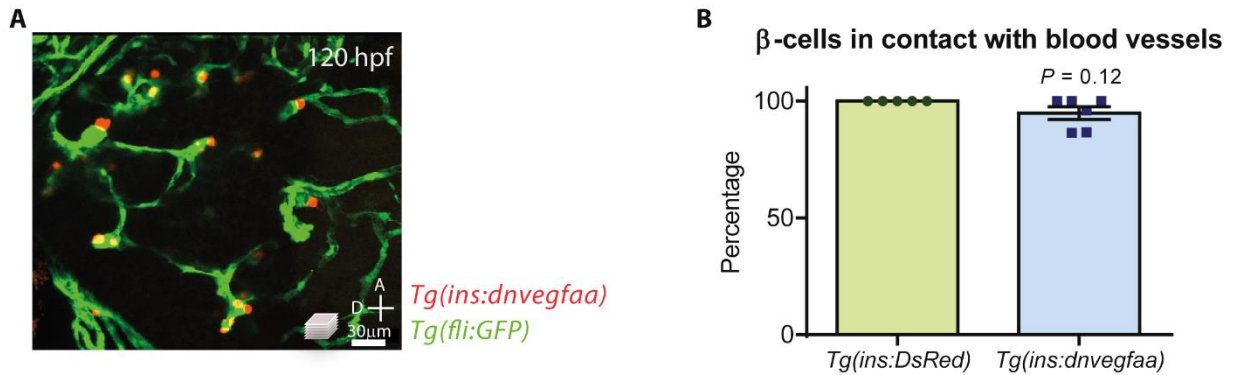

**Figure S3: β-cells in *Tg(ins:dnvegfaa)* animals are in contact with blood vessels.** A) Confocal projection image of the pancreatic islet in a 120 hpf *Tg(ins:dnvegfaa);Tg(fli:GFP)* animal showing β-cells (red). Maximum intensity projection is presented. B) Percentage of β-cells in contact with blood vessels in 120 hpf *Tg(ins:DsRed)* and *Tg(ins:dnvegfaa)* animals; mean ± SEM, n = 6-7 animals. *P* values from t-tests are presented.

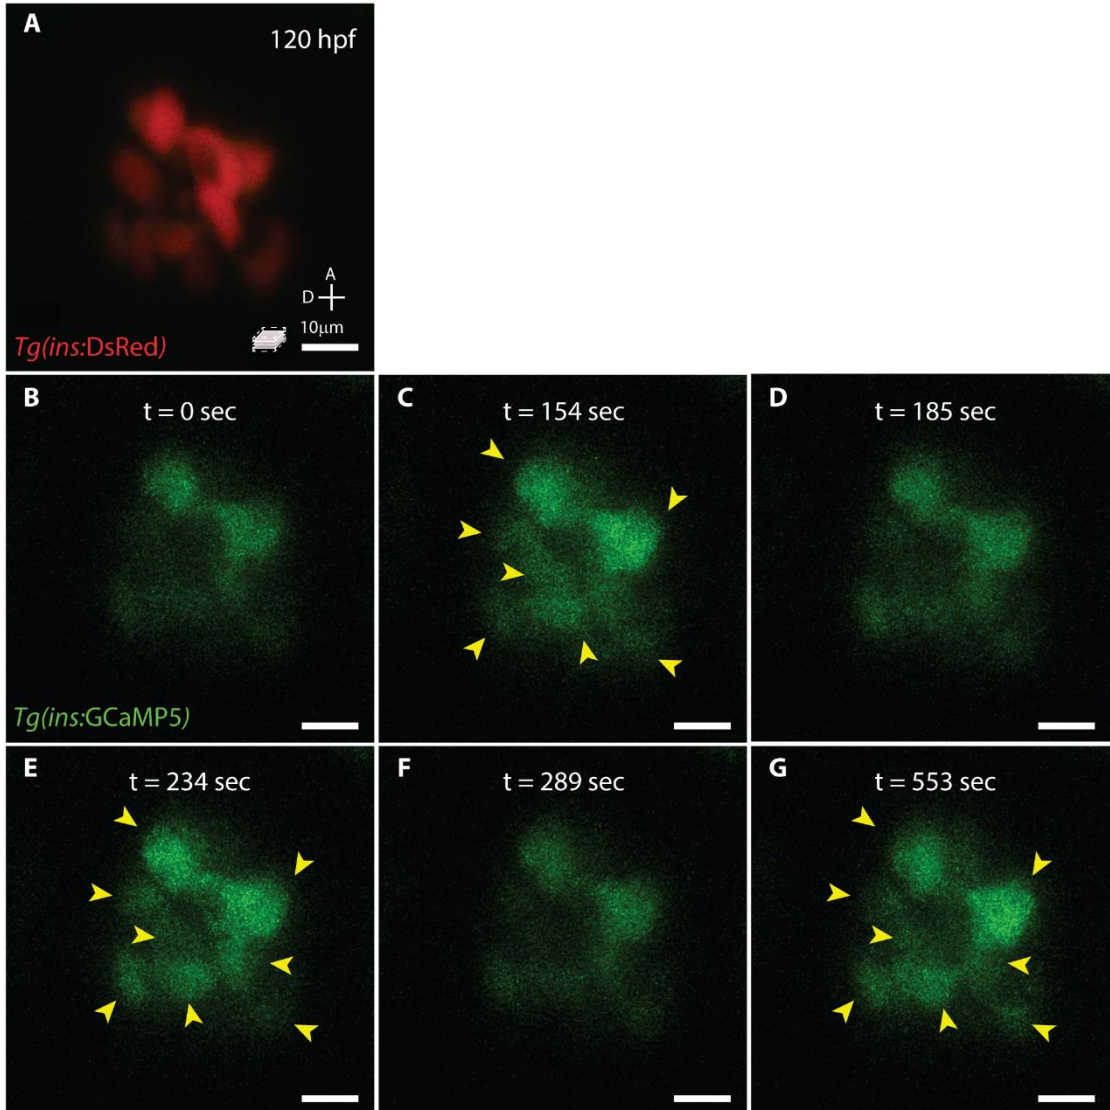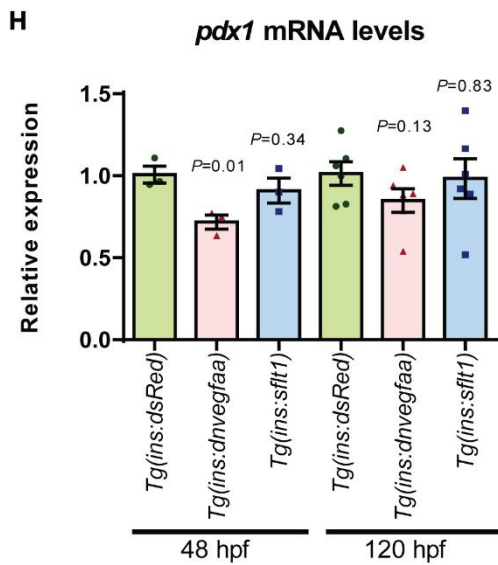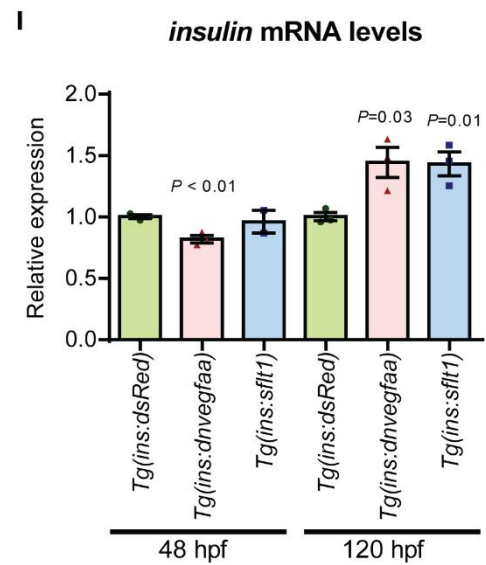

**Figure S4: Live imaging shows dynamics of calcium signaling in  $\beta$ -cells.** A) Pancreatic  $\beta$ -cells (red) in 120 hpf *Tg(ins:DsRed); Tg(ins:GCaMP5)* animals. B-G) Calcium responsive fluorescence signal in 120 hpf *Tg(ins:DsRed); Tg(ins:GCaMP5)* animals, at the indicated time point, from live confocal imaging. Yellow arrowheads point to  $\beta$ -cells showing an observable increase in fluorescence signal intensity. Maximum intensity projections of planes in the central 30  $\mu$ m region of the islet are shown. A, anterior; D, dorsal. H-I) *pdx1* (H) and *ins* (I) mRNA levels in 48 and 120 hpf animals; 3-6 replicates, 10 animals per replicate, mean  $\pm$  SEM. *P* values from t-tests are presented.

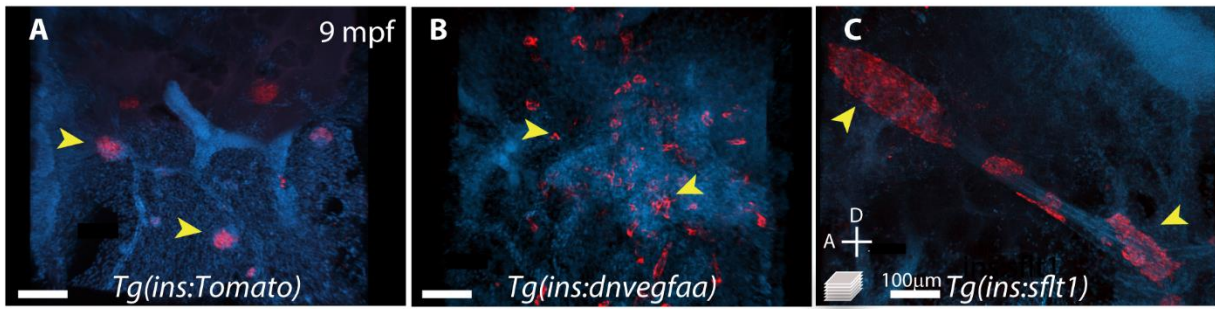

Insulin DNA

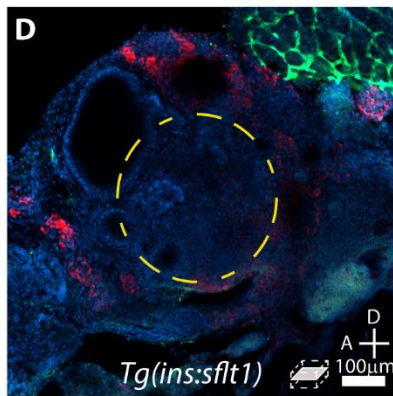

Insulin Tg(fli:GFP) DNA

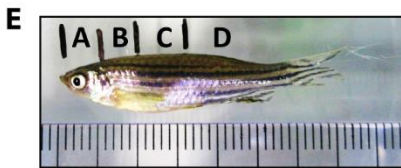

F

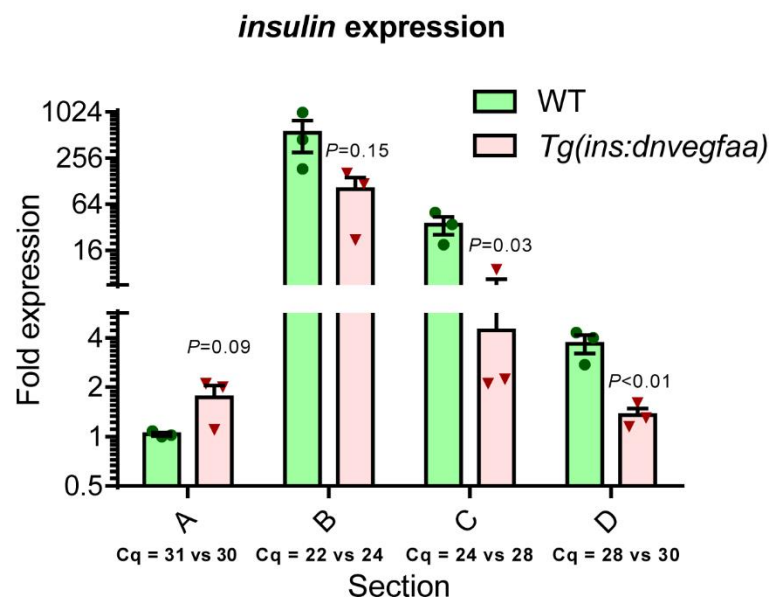

**G Total  $\beta$ -cell volume**

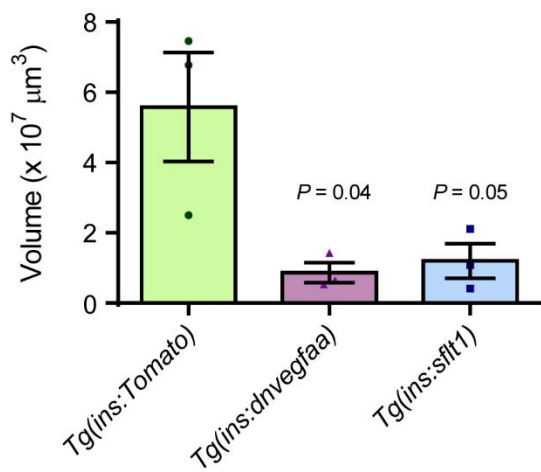

**H Volume of  $\beta$ -cells in secondary islets**

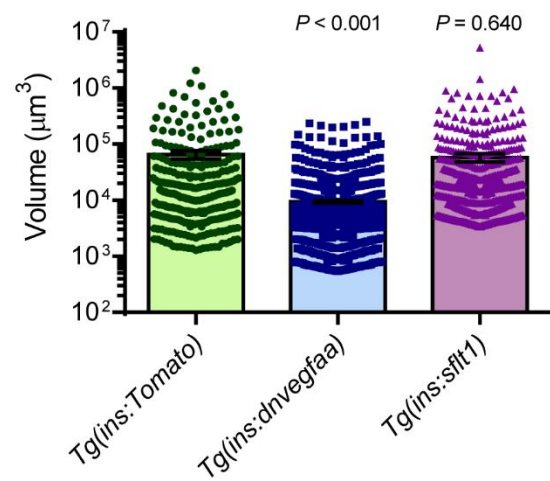

**Figure S5:  $\beta$ -cell specific expression of dnVegfaa or sFlt1 causes defects in secondary islet formation.**

A-C) Wholemount immunostaining for  $\beta$ -cells (Insulin) along the pancreatic ducts of 9 mpf zebrafish after CLARITY-based tissue clearing. Yellow arrowheads point to  $\beta$ -cell clusters. D) Wholemount immunostaining for  $\beta$ -cells (Insulin) in the primary islet of a 9 mpf *Tg(ins:sflt1); Tg(fli:GFP)* zebrafish after CLARITY-based tissue clearing. Yellow dotted line outlines the nuclei in the core of the islet. E) Adult zebrafish divided up into four sections, as marked, to obtain RNA and quantify *insulin* expression in each section separately; section A - head, heart, eyes; section B - anterior gastrointestinal (GI) tract; section C - posterior GI tract; section D - lower trunk and tail regions. F) *insulin* mRNA levels (qPCR) from each of the four sections along with Ct values. G) Volume of Insulin antibody immunostaining ( $\beta$ -cells) in adult zebrafish pancreas, computed using surface construction in Imaris. H) Volume of Insulin antibody immunostaining ( $\beta$ -cells) in secondary islets, computed using surface construction in Imaris. Data points greater than  $5.0 \times 10^5 \mu\text{m}^3$  in *Tg(ins:Tomato)* and *Tg(ins:sflt1)* animals correspond to the largest secondary islet clusters located close to the primary islet (Figure 4), mean  $\pm$  SEM, n = 3 animals, 100 to 560 secondary islets per animal, *P* values from t-tests are presented.

|                  | Ensembl Gene ID    | Gene          | Normalized Read Count ( $\beta$ -cells) | % of pancreatic cells with expression |
|------------------|--------------------|---------------|-----------------------------------------|---------------------------------------|
| <b>Ligands</b>   | ENSDARG00000035350 | <i>ins</i>    | 4324351                                 | 99.76                                 |
|                  | ENSDARG00000103542 | <i>vegfaa</i> | 4101                                    | 6.64                                  |
|                  | ENSDARG00000034700 | <i>vegfab</i> | 11588                                   | 13.72                                 |
|                  | ENSDARG00000069640 | <i>vegfc</i>  | 0                                       | 0.4                                   |
|                  | ENSDARG00000092480 | <i>vegffb</i> | 0                                       | ND                                    |
|                  | ENSDARG00000077588 | <i>pdgfc</i>  | 147                                     | 0.56                                  |
|                  | ENSDARG00000058424 | <i>pdgfab</i> | 420                                     | 1.61                                  |
|                  | ENSDARG00000055505 | <i>pdgfaa</i> | 194                                     | 1.05                                  |
|                  | ENSDARG00000077677 | <i>pdgfd</i>  | 442                                     | ND                                    |
|                  | ENSDARG00000038139 | <i>pdgffb</i> | 0                                       | 0.93                                  |
|                  | ENSDARG00000005001 | <i>grem2</i>  | 178                                     | 1.57                                  |
| <b>Receptors</b> | ENSDARG00000019371 | <i>flt1</i>   | 1                                       | 1.01                                  |
|                  | ENSDARG00000017321 | <i>kdr</i>    | 0                                       | 0.08                                  |
|                  | ENSDARG00000105215 | <i>kdrl</i>   | 16                                      | 1.97                                  |
|                  | ENSDARG00000015717 | <i>flt4</i>   | 1                                       | 0.64                                  |
|                  | ENSDARG00000070494 | <i>pdgfra</i> | 2                                       | 0.68                                  |
|                  | ENSDARG00000100897 | <i>pdgfrb</i> | 0                                       | ND                                    |
|                  | ENSDARG00000006456 | <i>pdgfrl</i> | 755                                     | 0.60                                  |
|                  | ENSDARG00000027290 | <i>nrp1b</i>  | 58                                      | 0.32                                  |
|                  | ENSDARG00000071865 | <i>nrp1a</i>  | 139                                     | 2.01                                  |
|                  | ENSDARG00000096546 | <i>nrp2a</i>  | 175                                     | 0.40                                  |
|                  | ENSDARG00000038446 | <i>nrp2b</i>  | 0                                       | 0.20                                  |

**Table S1: Pancreatic  $\beta$ -cell expression of Vegf family ligand and receptor genes.** Normalized read counts (Tarifeño-Saldivia et al., 2017) and percentage of pancreatic cells (Salem et al., 2019) expressing different Vegf family ligand and receptor genes; ND, not detected.



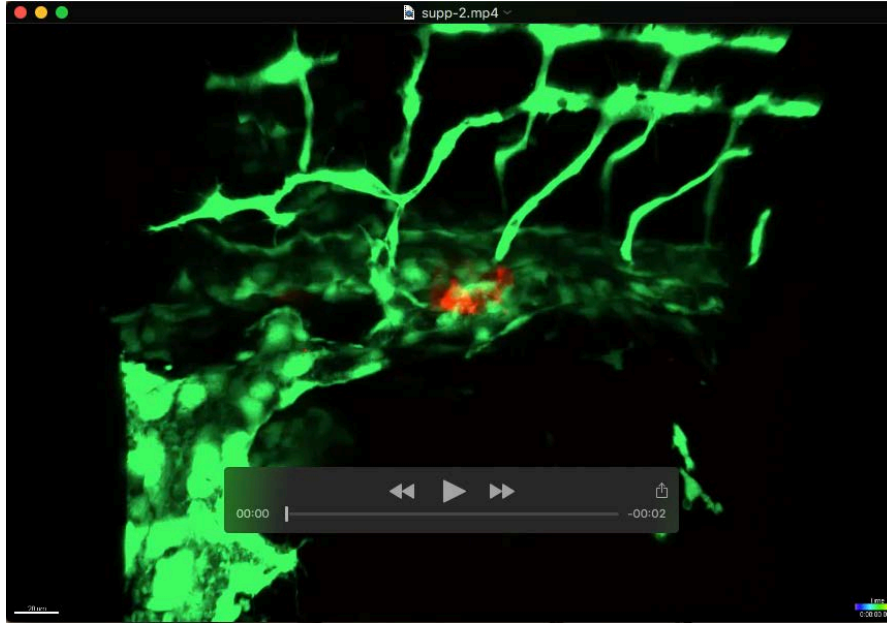

**Movie 1: Time-lapse imaging shows collective migration of  $\beta$ -cells and their interaction with the vasculature in wild-type embryos.** Confocal imaging of *Tg(ins:Tomato); Tg(fli:GFP)* zebrafish from 34 to 48 hpf at 60 min time intervals. Movie corresponds to Figure 1e.

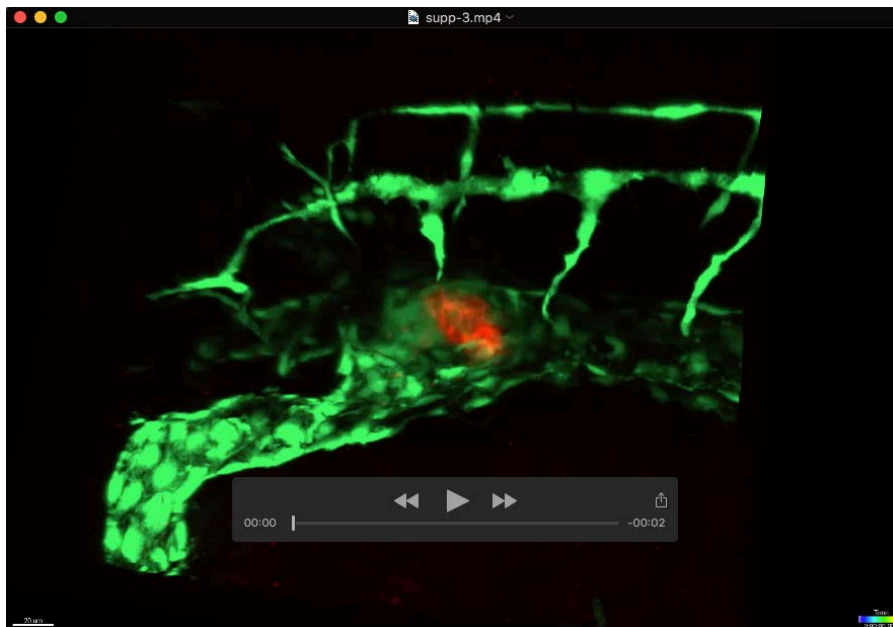

**Movie 2: Time-lapse imaging shows dispersion of  $\beta$ -cells in *Tg(ins:dnvegfaa)* embryos.** Confocal imaging of *Tg(ins:dnvegfaa); Tg(fli:GFP)* zebrafish from 34 to 48 hpf at 60 min time intervals.  $\beta$ -cells are marked in red. Movie corresponds to Figure 1f.

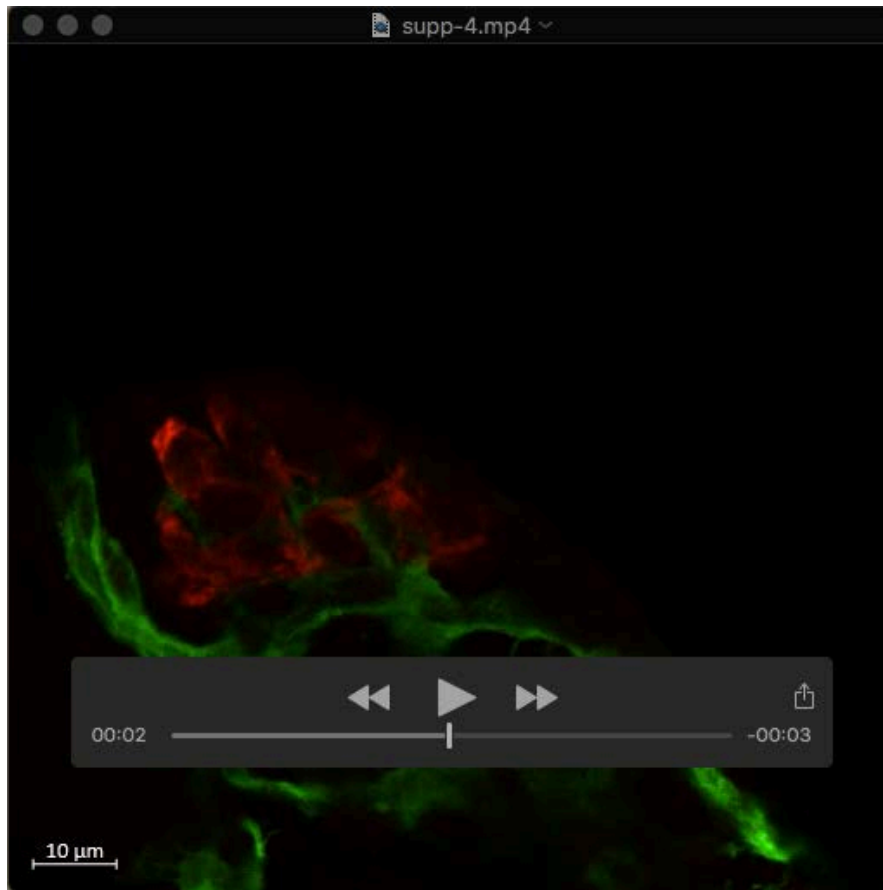

**Movie 3: Wild-type pancreatic islets contain intra-islet vessels.** Progressive planes in a Z-stack from confocal imaging of pancreatic islets in 48 hpf *Tg(ins:DsRed); Tg(fli:GFP)* zebrafish, with immunostaining for Insulin (red) and GFP. Movie corresponds to Figure 2c.

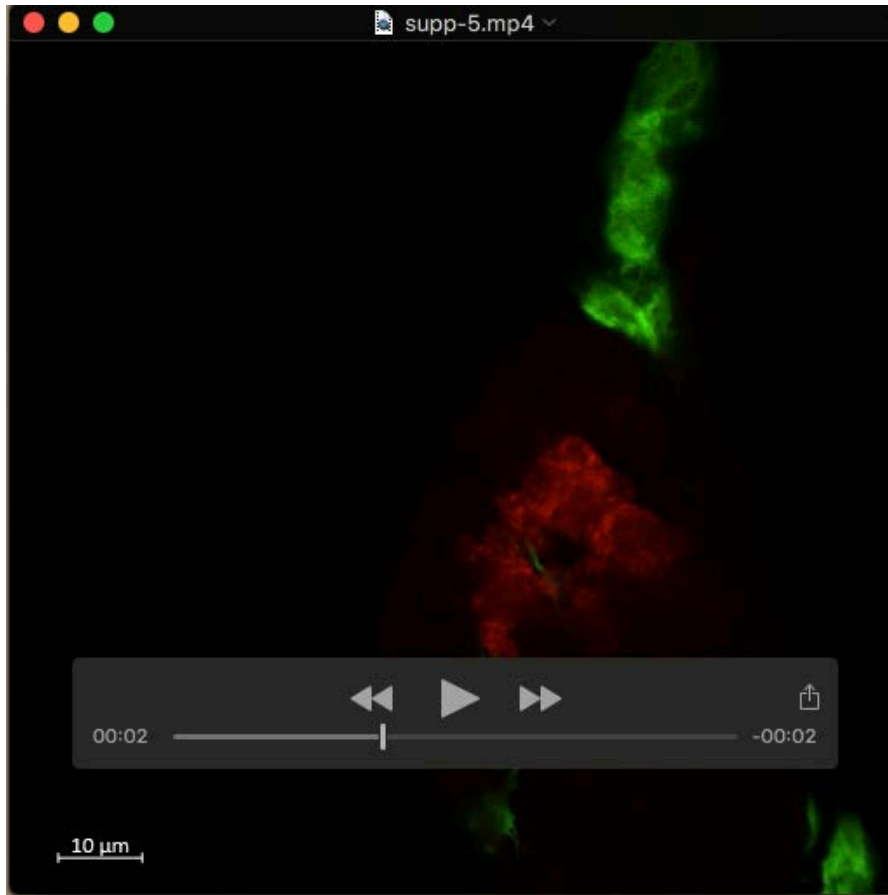

**Movie 4:  $\beta$ -cell-specific sFlt1 expression results in markedly reduced intra-islet vasculature.**

Progressive planes in a Z-stack from confocal imaging of pancreatic islets in 48 hpf *Tg(ins:sflt1); Tg(fli:GFP)* zebrafish, after immunostaining for Insulin (red) and GFP. Movie corresponds to Figure 2j.

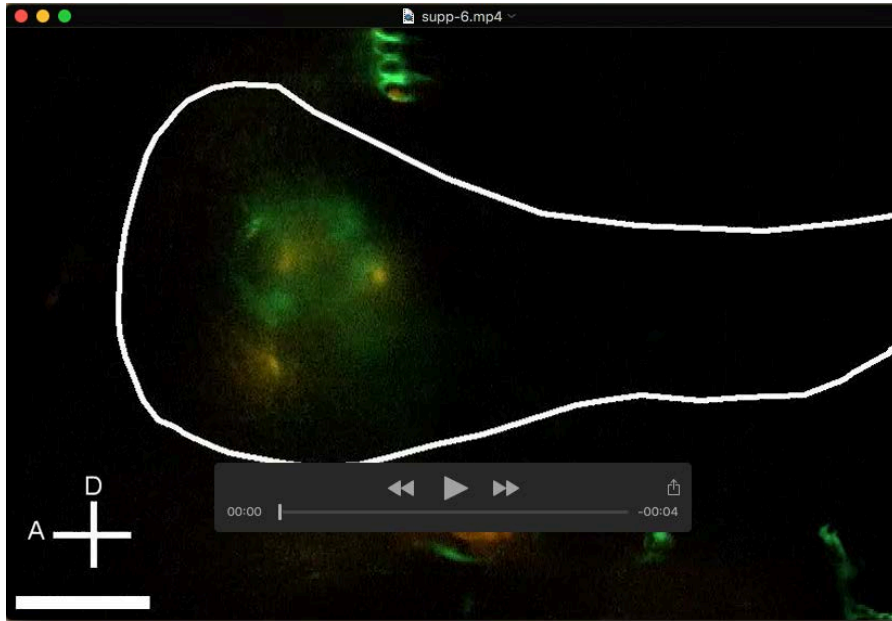

**Movie 5: Live imaging shows circulating red blood cells in wild-type larval pancreas.** Spinning disk confocal imaging of the pancreatic islet in 120 hpf *Tg(gata1:DsRed); Tg(fli:GFP)* zebrafish, showing circulating red blood cells (red). Pancreas is outlined in white. Scale bar, 40  $\mu$ m.

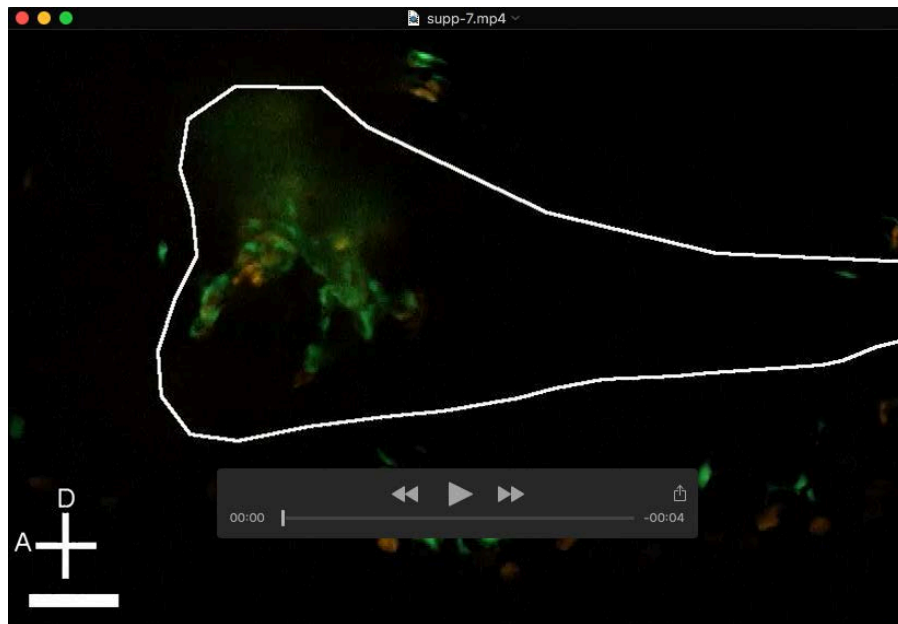

**Movie 6: Live imaging shows circulating red blood cells and disrupted vasculature in *Tg(ins:dnvegfaa)* pancreas.** Spinning disk confocal imaging of the pancreatic islet in 120 hpf *Tg(ins:dnvegfaa); Tg(gata1:DsRed); Tg(fli:GFP)* zebrafish. Pancreas is outlined in white. Scale bar, 40  $\mu$ m.

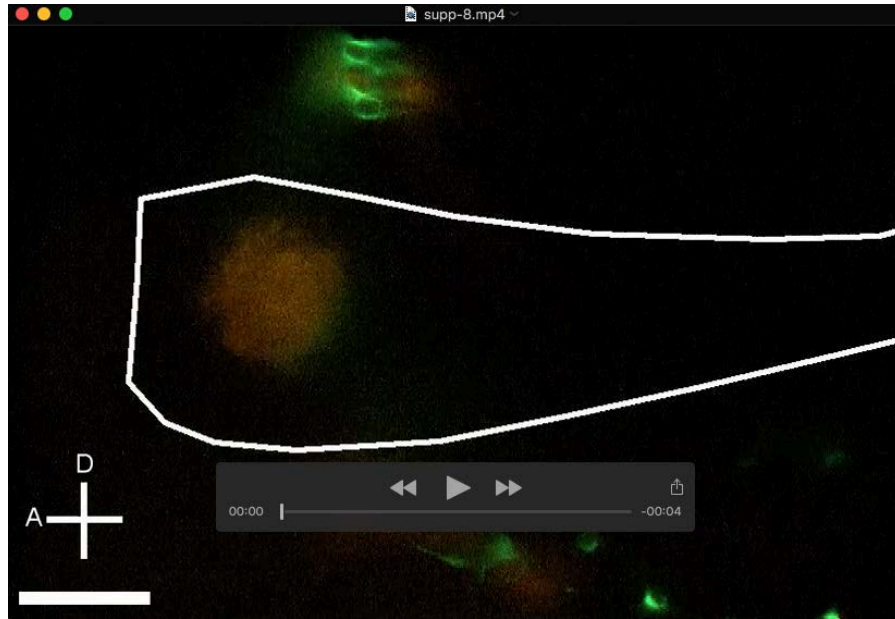

**Movie 7: Live imaging shows lack of vasculature and circulation in *Tg(ins:sflt1)* pancreas.** Spinning disk confocal imaging of the pancreatic islet in 120 hpf *Tg(ins:sflt1); Tg(gata1:DsRed); Tg(fli:GFP)* zebrafish. Faint red signal in the anterior region of the pancreas (outlined in white) is from  $\beta$ -cells. Scale bar, 40  $\mu$ m.

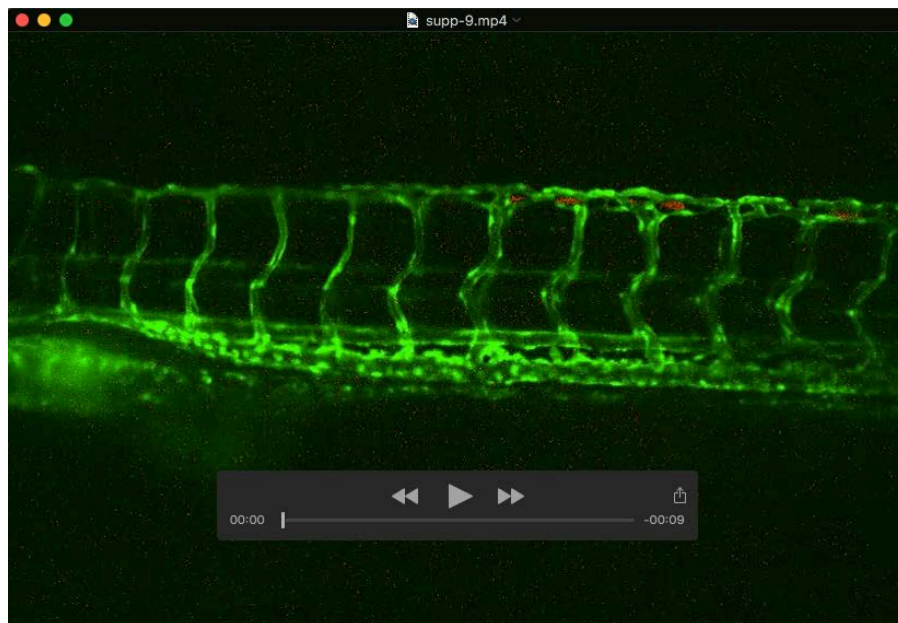

**Movie 8: Live imaging shows circulating  $\beta$ -cell in *Tg(ins:dnvegfaa)* larvae.** Spinning disk confocal imaging of 72 hpf *Tg(ins:dnvegfaa); Tg(fli:GFP)* zebrafish. Arrowhead points to the  $\beta$ -cells circulating in the trunk region.
